# Supplementary material for: Best Practices for Municipalities to Promote Online Citizen Participation and Engagement on Facebook: A Narrative Review of the Literature
Source: MDPI journal article supplement (doi:10.3390/socsci13030127), 2024-02-22
Supplement: s1 [file s1]

Supplementary Material S1. Documents included in the review

| Title                                                                                                                                                  | Author(s)                                    | Year | Source                                                 | Country     |
|--------------------------------------------------------------------------------------------------------------------------------------------------------|----------------------------------------------|------|--------------------------------------------------------|-------------|
| <b>Scientific literature</b>                                                                                                                           |                                              |      |                                                        |             |
| 1. <i>The Good, the Bad and the Ugly: Three Faces of Social Media Usage by Local Governments</i>                                                       | Silva et al.                                 | 2019 | <i>Government Information Quarterly</i>                | Portugal    |
| 2. Facebook Content Strategies and Citizens' Online Engagement: The Case of Greek Local Governments                                                    | Lappas et al.                                | 2018 | <i>The Review of Socionetwork Strategies</i>           | Greece      |
| 3. Social Media as Sociomaterial Service: On Practicing Public Service Innovation in Municipalities                                                    | Norström                                     | 2019 | PhD dissertation                                       | Sweden      |
| 4. Using Social Media to Enhance Citizen Engagement with Local Government: Twitter or Facebook?                                                        | Haro-de-Rosario, Sáez-Martín, and Caba-Pérez | 2018 | <i>New Media &amp; Society</i>                         | Spain       |
| 5. Facebook Practices in Western European Municipalities: An Empirical Analysis of Activity and Citizens' Engagement                                   | Bonsón, Royo, and Ratkai                     | 2017 | <i>Administration &amp; Society</i>                    | Spain       |
| 6. Citizens' Engagement on Local Governments' Facebook Sites. An Empirical Analysis: The Impact of Different Media and Content Types in Western Europe | Bonsón, Royo, and Ratkai                     | 2015 | <i>Government Information Quarterly</i>                | Spain       |
| 7. Beyond Technology: Identifying Local Government Challenges for Using Digital Platforms for Citizen Engagement                                       | Falco and Kleinhans                          | 2018 | <i>International Journal of Information Management</i> | Netherlands |
| 8. Determinants of Public Engagement on Municipal Facebook Pages                                                                                       | Metallo et al.                               | 2018 | <i>The Information Society</i>                         | Italy       |

|                                                                                                                                     |                                                           |      |                                                                                                                    |               |
|-------------------------------------------------------------------------------------------------------------------------------------|-----------------------------------------------------------|------|--------------------------------------------------------------------------------------------------------------------|---------------|
| <b>9.</b> Flocking to Facebook: How Local Governments Can Build Citizen Engagement                                                  | Strecker                                                  | 2011 | Master's thesis                                                                                                    | United States |
| <b>10.</b> What Makes Local Governments' Online Communications Successful? Insights from a Multi-method Analysis of Facebook        | Hofmann et al.                                            | 2013 | <i>Government Information Quarterly</i>                                                                            | Germany       |
| <b>11.</b> Municipalities e-Participation Initiatives through Facebook: Citizens Perspective                                        | Alarabiat, Soares, and Estevez                            | 2020 | <i>Proceedings of the 13<sup>th</sup> International Conference on Theory and Practice of Electronic Governance</i> | Jordan        |
| <b>12.</b> Determinants of Citizens' Intention to Engage in Government-Led Electronic Participation Initiatives through Facebook    | Alarabiat, Soares, and Estevez                            | 2021 | <i>Government Information Quarterly</i>                                                                            | Jordan        |
| <b>13.</b> Citizen Involvement is the New Black: A Qualitative Case Study of Large and Small Municipalities' Social Media Use       | Blauenfeldt                                               | 2017 | Master's thesis                                                                                                    | Denmark       |
| <b>14.</b> Municipal Engagement on Facebook in Turkey: Differences by Political Party, Region, and Size                             | Bozkanat                                                  | 2020 | <i>Ilef Dergisi</i>                                                                                                | Turkey        |
| <b>15.</b> Exploring Dialogic Strategies in Social Media for Fostering Citizens' Interactions with Latin American Local Governments | del Mar Gálvez-Rodríguez et al.                           | 2018 | <i>Public Relations Review</i>                                                                                     | Spain         |
| <b>16.</b> Improving Citizens' Online Engagement via Community Managers: An Explanatory Study                                       | del Mar Gálvez-Rodríguez, Haro-de-Rosario, and Caba-Pérez | 2018 | <i>Information, Communication &amp; Society</i>                                                                    | Spain         |
| <b>17.</b> Local Engagement Online: Municipal                                                                                       | Lev-On and Steinfeld                                      | 2015 | <i>Government Information Quarterly</i>                                                                            | Israel        |

|                                                                                                                                            |                                              |      |                                          |                   |
|--------------------------------------------------------------------------------------------------------------------------------------------|----------------------------------------------|------|------------------------------------------|-------------------|
| Facebook Pages as Hubs of Interaction                                                                                                      |                                              |      |                                          |                   |
| <b>18.</b> Listening to Digital Publics. Investigating Citizens' Voices and Engagement within Italian Municipalities' Facebook Pages       | Lovari and Parisi                            | 2015 | <i>Public Relations Review</i>           | Italy             |
| <b>19.</b> The Impact of Social Media on Local Government Transparency and Engagement                                                      | Mahajan-Cusack                               | 2016 | PhD dissertation                         | United States     |
| <b>20.</b> Understanding How the City of Johannesburg Metropolitan Municipality's Social Media Platforms are Perceived by Young Citizens   | Phuluwa and Hattingh                         | 2017 | <i>IST-Africa Conference Proceedings</i> | South Africa      |
| <b>Documents from the grey literature</b>                                                                                                  |                                              |      |                                          |                   |
| <i>Guides</i>                                                                                                                              |                                              |      |                                          |                   |
| <b>21.</b> Social Media Resource Guide                                                                                                     | The Alberta Urban Municipalities Association | 2015 | <a href="#">Internet</a>                 | Canada            |
| <b>22.</b> The Government's Guide to Using Facebook                                                                                        | Andrews                                      | 2015 | <a href="#">Internet</a>                 | United States     |
| <b>23.</b> e-Government Toolkit for Municipalities in Eastern Ontario                                                                      | Higgins                                      | 2017 | <a href="#">Internet</a>                 | Canada            |
| <b>24.</b> Social Media in Government: High Level Adoption Guidelines                                                                      | Information Technology Authority             | 2016 | <a href="#">Internet</a>                 | Sultanate of Oman |
| <i>Reports</i>                                                                                                                             |                                              |      |                                          |                   |
| <b>25.</b> Utilisation des réseaux sociaux par les villes et communautés wallonnes en 2017: Résultats de l'enquête réalisée par FuturoCité | FuturoCité                                   | 2017 | <a href="#">Internet</a>                 | Belgium           |
| <i>Websites</i>                                                                                                                            |                                              |      |                                          |                   |

|                                                                                                                    |                               |      |                                     |               |
|--------------------------------------------------------------------------------------------------------------------|-------------------------------|------|-------------------------------------|---------------|
| <b>26.</b> Social Media and Municipalities: Risks and Rewards                                                      | Redbrick Communications       | 2012 | <a href="#">Internet</a>            | Canada        |
| <b>27.</b> Three Golden Rules of Social Media for Municipalities                                                   | Treleven                      | 2014 | <a href="#">Internet</a>            | Canada        |
| <b>28.</b> Social Media in Government: Benefits, Challenges, and How it's Used                                     | Beveridge and Tran            | 2020 | <a href="#">Internet</a>            | United States |
| <b>29.</b> 7 Steps to Social Media Success                                                                         | Jenkins and Owens             | N/A  | <a href="#">Internet</a>            | United States |
| <i>Newspaper articles</i>                                                                                          |                               |      |                                     |               |
| <b>30.</b> Municipalités sur Facebook : un bien nécessaire ?                                                       | N/A                           | 2017 | L'info du Nord : Vallée de la Rouge | Canada        |
| <b>31.</b> Les municipalités à l'ère des réseaux sociaux                                                           | Gagné                         | 2017 | Le Devoir                           | Canada        |
| <i>Municipal policies</i>                                                                                          |                               |      |                                     |               |
| <b>32.</b> Politique d'utilisation des réseaux sociaux de la Municipalité de Sainte-Sophie                         | Municipalité de Sainte-Sophie | 2019 | <a href="#">Internet</a>            | Canada        |
| <b>33.</b> Politique d'utilisation des réseaux sociaux                                                             | Municipalité de Saint-Amable  | 2020 | <a href="#">Internet</a>            | Canada        |
| <b>34.</b> Nétiquette : Politique d'utilisation de la page Facebook de la Municipalité de Saint-Mathieu-de-Beloeil | Saint-Mathieu de Beloeil      | 2017 | <a href="#">Internet</a>            | Canada        |
| <b>35.</b> Politique d'utilisation des réseaux sociaux de la Municipalité de Saint-Bernard-de-Michaudville         | Saint-Bernard-de-Michaudville | 2017 | <a href="#">Internet</a>            | Canada        |

*Note.* N/A: not available.
